# Supplementary material for: Fractal Patterns in Groundwater Radon Disturbances Prior to the Great <em>M<sub>w</sub></em>=7.9 Wenchuan Earthquake, China
Source: Preprints.org preprint supplement (doi:10.20944/preprints202306.1473.v1), 2023-06-21
Supplement: Supplementary file 2 [file supplementary]

Fractal analysis of one-year radon radon in ground water disturbances amid the great Mw=7.9 great Wenchuan earthquake, China

Computational two-step identification of common dates with values out-of-thresholds in the fractal outputs of five distinct techniques

The coincidences of up to 13 different techniques are before the great Wenchuan earthquake
