# Supplementary material for: Fractal Patterns in Groundwater Radon Disturbances Prior to the Great <em>M<sub>w</sub></em>=7.9 Wenchuan Earthquake, China
Source: Preprints.org preprint supplement (doi:10.20944/preprints202306.1473.v1), 2023-06-21
Supplement: Supplementary file 3 [file supplementary]

THERE IS NO CONFLICT OF INTEREST
