# Supplementary material for: Fractal Patterns in Groundwater Radon Disturbances Prior to the Great <em>M<sub>w</sub></em>=7.9 Wenchuan Earthquake, China
Source: Preprints.org preprint supplement (doi:10.20944/preprints202306.1473.v1), 2023-06-21
Supplement: Supplementary file 5 [file supplementary]

# Fractal Patterns in groundwater radon disturbances prior to the great Mw=7.9 Wenchuan Earthquake, China

Aftab Alam<sup>a</sup>, Dimitrios Nikolopoulos<sup>b,\*</sup> Nanping Wang<sup>c</sup>

<sup>a</sup>*Centre for Earthquake Studies, National Centre for Physics, Islamabad, Pakistan*

<sup>b</sup>*University of West Attica Department of Industrial Design and Production Engineering, Petrou Ralli & Thivon 250, Aigaleo, GR-12244, Athens, Greece*

<sup>c</sup>*Key Laboratory of Geo-Detection, Ministry of Education, China University of Geosciences, Beijing, China & School of Geophysics and Information Technology, China University of Geosciences, Beijing, China*

\* Correspondence: Dimitrios Nikolopoulos, *University of West Attica Department of Industrial Design and Production Engineering.*

## Author Data

### 1st Author

First name Aftab

Surname Alam

[aftabalamgeo@outlook.com](mailto:aftabalamgeo@outlook.com)

### 2nd Author

First Name Dimitrios

Surname Nikolopoulos

[dniko@uniwa.gr](mailto:dniko@uniwa.gr)

### 3rd Author

First name Nanping

Surname Wang

[npwang@cugb.edu.cn](mailto:npwang@cugb.edu.cn)
