# Supplementary material for: Fractal Patterns in Groundwater Radon Disturbances Prior to the Great <em>M<sub>w</sub></em>=7.9 Wenchuan Earthquake, China
Source: Preprints.org preprint supplement (doi:10.20944/preprints202306.1473.v1), 2023-06-21
Supplement: Supplementary file 8 [file supplementary]

**Declaration of interests**

☒ The authors declare that they have no known competing financial interests or personal relationships that could have appeared to influence the work reported in this paper.

☐ The authors declare the following financial interests/personal relationships which may be considered as potential competing interests:
